# Supplementary material
Source: publisher figshare collection journal article supplement (https://gsajournals.figshare.com/ndownloader/files/13878986)
Supplement: Supplementary file 1 [file 13878986]

Table S6 Genes involved in metabolism in the *M. dispar* GS01 genome

| Locus | Product | Gene | Class | Protein length (aa) | Position |
| --- | --- | --- | --- | --- | --- |
| M.dispar-GS01_GM000002 | DNA polymerase III beta subunit | *dnaN* | Nucleotide metabolism | 378 | 1550…2686 |
| M.dispar-GS01_GM000014 | fructose-bisphosphate aldolase, class II | *fbaA* | Carbohydrate metabolism | 287 | 14774…15637 |
| M.dispar-GS01_GM000023 | glyceraldehyde 3-phosphate dehydrogenase | *gapA* | Carbohydrate metabolism | 336 | 27739…28749 |
| M.dispar-GS01_GM000027 | 5'-nucleotidase | - | Nucleotide metabolism | 690 | 30012…32084 |
| M.dispar-GS01_GM000030 | cardiolipin synthetase | *cls* | Lipid metabolism | 510 | 34581…36113 |
| M.dispar-GS01_GM000039 | ATP synthase A chain | *atpB* | Energy metabolism | 242 | 43102…43830 |
| M.dispar-GS01_GM000040 | ATP synthase C chain | *atpE* | Energy metabolism | 101 | 43881…44186 |
| M.dispar-GS01_GM000041 | ATP synthase subunit B | *atpF* | Energy metabolism | 185 | 44227…44784 |
| M.dispar-GS01_GM000042 | ATP synthase delta chain | *atpH* | Energy metabolism | 187 | 44793…45356 |
| M.dispar-GS01_GM000043 | ATP synthase subunit alpha | *atpA* | Energy metabolism | 507 | 45373…46896 |
| M.dispar-GS01_GM000044 | ATP synthase F1 subunit gamma | *atpG* | Energy metabolism | 276 | 46925…47755 |
| M.dispar-GS01_GM000045 | ATP synthase beta chain | *atpD* | Energy metabolism | 471 | 47774…49189 |
| M.dispar-GS01_GM000046 | ATP synthase subunit epsilon | *atpC* | Energy metabolism | 86 | 49176…49436 |
| M.dispar-GS01_GM000068 | cytidylate kinase | *cmk* | Nucleotide metabolism | 227 | 78476…79159 |
| M.dispar-GS01_GM000083 | DNA-directed RNA polymerase subunit beta' | *rpoC* | Nucleotide metabolism | 1413 | 100365…104606 |
| M.dispar-GS01_GM000084 | DNA-directed RNA polymerase subunit beta | *rpoB* | Nucleotide metabolism | 1216 | 104668…108318 |
| M.dispar-GS01_GM000101 | inorganic pyrophosphatase | *ppa* | Energy metabolism | 185 | 134309…134866 |
| M.dispar-GS01_GM000106 | thymidine kinase | *tdk* | Nucleotide metabolism | 184 | 140815…141369 |
| M.dispar-GS01_GM000108 | PTS system, glucose-specific IIA component | *crr* | Carbohydrate metabolism | 823 | 142143…144614 |
| M.dispar-GS01_GM000117 | cysteine desulfurase / selenocysteine lyase | *sufS* | Metabolism of other amino acids | 391 | 154838…156013 |
| M.dispar-GS01_GM000121 | phosphopentomutase | *deoB* | Carbohydrate metabolism | 398 | 158373…159569 |
| M.dispar-GS01_GM000125 | cytidine deaminase | *Cda* | Nucleotide metabolism | 131 | 162510…162905 |
| M.dispar-GS01_GM000141 | ribonucleotide-diphosphate reductase subunit beta | *nrdB* | Nucleotide metabolism | 348 | 182954…184000 |
| M.dispar-GS01_GM000143 | ribonucleoside-diphosphate reductase alpha chain | *nrdA* | Nucleotide metabolism | 720 | 184457…186619 |
| M.dispar-GS01_GM000149 | glycine hydroxymethyltransferase | *glyA* | Amino acid metabolism | 418 | 191709…192965 |
| M.dispar-GS01_GM000156 | ribose-5-phosphate isomerase B | *rpiB* | Carbohydrate metabolism | 162 | 201431…201919 |
| M.dispar-GS01_GM000158 | Ribulose-phosphate 3-epimerase | *rpe* | Carbohydrate metabolism | 217 | 203191…203844 |
| M.dispar-GS01_GM000162 | PTS system, ascorbate-specific IIA component | *ulaC* | Carbohydrate metabolism | 151 | 205417…205872 |
| M.dispar-GS01_GM000163 | PTS system, ascorbate-specific IIB component | *ulaB* | Carbohydrate metabolism | 91 | 205862…206137 |
| M.dispar-GS01_GM000165 | PTS system, ascorbate-specific IIC component | *ulaA* | Carbohydrate metabolism | 241 | 206463…207188 |
| M.dispar-GS01_GM000168 | Transketolase I | *tktA* | Carbohydrate metabolism | 335 | 207756…208763 |
| M.dispar-GS01_GM000169 | transketolase | *tktA* | Carbohydrate metabolism | 279 | 208751…209590 |
| M.dispar-GS01_GM000176 | PTS system, mannitol-specific IIB component | *mtlA* | Carbohydrate metabolism | 489 | 217686…219155 |
| M.dispar-GS01_GM000177 | mannitol-1-phosphate 5-dehydrogenase | *mtlD* | Carbohydrate metabolism | 362 | 219155…220243 |
| M.dispar-GS01_GM000178 | PTS system, mannitol-specific IIA componen | *mtlA* | Carbohydrate metabolism | 142 | 220247…220675 |
| M.dispar-GS01_GM000188 | pyruvate kinase | *pyk* | Carbohydrate metabolism | 411 | 226066…227301 |
| M.dispar-GS01_GM000202 | L-lactate dehydrogenase | *ldh* | Carbohydrate metabolism | 315 | 244120…245067 |
| M.dispar-GS01_GM000207 | glutamyl-tRNA synthetase | *gltX* | Metabolism of cofactors and vitamins | 467 | 250283…251686 |
| M.dispar-GS01_GM000274 | CDP-diacylglycerol--glycerol-3-phosphate 3-phosphatidyltransferase | *pgsA* | Lipid metabolism | 205 | 337543…338160 |
| M.dispar-GS01_GM000275 | CTP synthetase | *pyrG* | Nucleotide metabolism | 534 | 338157…339761 |
| M.dispar-GS01_GM000279 | riboflavin kinase / FMN adenylyltransferase | *ribF* | Metabolism of cofactors and vitamins | 277 | 347465…348298 |
| M.dispar-GS01_GM000293 | acetylmannosamine-6-phosphate 2-epimerase | *nanE* | Carbohydrate metabolism | 232 | 369835…370533 |
| M.dispar-GS01_GM000295 | N-acetylneuraminate lyase | *nanA* | Carbohydrate metabolism | 293 | 372443…373324 |
| M.dispar-GS01_GM000325 | adenylate kinase | *adk* | Nucleotide metabolism | 212 | 394709…395347 |
| M.dispar-GS01_GM000330 | DNA-directed RNA polymerase alpha subunit | *rpoA* | Nucleotide metabolism | 332 | 397460…398458 |
| M.dispar-GS01_GM000354 | S-adenosylmethionine synthetase | *metK* | Amino acid metabolism | 380 | 441042…442184 |
| M.dispar-GS01_GM000372 | PTS system, ascorbate-specific IIC component | *ulaA* | Carbohydrate metabolism | 604 | 463083…464897 |
| M.dispar-GS01_GM000373 | PTS system, ascorbate-specific IIB component | *ulaB* | Carbohydrate metabolism | 96 | 465085…465375 |
| M.dispar-GS01_GM000374 | PTS system, ascorbate-specific IIA component | *ulaC* | Carbohydrate metabolism | 159 | 465397…465876 |
| M.dispar-GS01_GM000376 | glycerophosphoryl diester phosphodiesterase | *glpQ* | Lipid metabolism | 241 | 467091…467816 |
| M.dispar-GS01_GM000379 | nicotinate-nucleotide adenylyltransferase | *nadD* | Metabolism of cofactors and vitamins | 362 | 468858…469946 |
| M.dispar-GS01_GM000380 | S-adenosylhomocysteine/5'-methylthioadenosine nucleosidase | *mtnN* | Amino acid metabolism | 218 | 469927…470583 |
| M.dispar-GS01_GM000413 | nicotinate phosphoribosyltransferase | *pncB* | Metabolism of cofactors and vitamins | 338 | 528292…529308 |
| M.dispar-GS01_GM000415 | methionyl-tRNA synthetase | *metG* | Metabolism of other amino acids | 514 | 530061…531605 |
| M.dispar-GS01_GM000429 | acetate kinase | *ackA* | Metabolism of other amino acids | 402 | 548579…549787 |
| M.dispar-GS01_GM000430 | phosphate acetyltransferase | *pta* | Metabolism of other amino acids | 317 | 549787…550740 |
| M.dispar-GS01_GM000442 | uracil phosphoribosyltransferase | *upp* | Nucleotide metabolism | 204 | 574546…575160 |
| M.dispar-GS01_GM000443 | deoxyribose-phosphate aldolase | *deoC* | Carbohydrate metabolism | 221 | 575246…575911 |
| M.dispar-GS01_GM000444 | thymidine phosphorylase | *deoA* | Nucleotide metabolism | 427 | 575962…577245 |
| M.dispar-GS01_GM000445 | purine-nucleoside phosphorylase | *deoD* | Nucleotide metabolism | 232 | 577248…577946 |
| M.dispar-GS01_GM000458 | NAD+ synthase | *nadE* | Metabolism of cofactors and vitamins | 246 | 589516…590256 |
| M.dispar-GS01_GM000460 | L-lactate dehydrogenase | *ldh* | Carbohydrate metabolism | 305 | 592302…593219 |
| M.dispar-GS01_GM000467 | leucyl aminopeptidase | *pepA* | Metabolism of other amino acids | 457 | 600642…602015 |
| M.dispar-GS01_GM000472 | 3-dehydro-L-gulonate-6-phosphate decarboxylase | *ulaD* | Carbohydrate metabolism | 222 | 611065…611733 |
| M.dispar-GS01_GM000473 | L-ribulose-5-phosphate 3-epimerase | *ulaE* | Carbohydrate metabolism | 296 | 611708…612598 |
| M.dispar-GS01_GM000474 | L-ribulose-5-phosphate 4-epimerase | *ulaF* | Carbohydrate metabolism | 241 | 612588…613313 |
| M.dispar-GS01_GM000481 | transketolase | *tktA* | Carbohydrate metabolism | 615 | 620219…622066 |
| M.dispar-GS01_GM000498 | pyruvate dehydrogenase complex E3 subunit(dihydrolipoamide dehydrogenase) | *pdhD* | Carbohydrate metabolism | 617 | 636020…637873 |
| M.dispar-GS01_GM000499 | pyruvate dehydrogenase E2 component (dihydrolipoamide acetyltransferase) | *pdhC* | Carbohydrate metabolism | 306 | 637873…638793 |
| M.dispar-GS01_GM000519 | alcohol dehydrogenase | *adh* | Carbohydrate metabolism | 348 | 659678…660724 |
| M.dispar-GS01_GM000537 | DNA (cytosine-5-)-methyltransferase | *dcm* | Amino acid metabolism | 603 | 681309…683120 |
| M.dispar-GS01_GM000543 | mannose-6-phosphate isomerase | *manA* | Carbohydrate metabolism | 301 | 696983…697888 |
| M.dispar-GS01_GM000545 | PTS system, fructose-specific IIA component | *fruB* | Carbohydrate metabolism | 663 | 698160…700151 |
| M.dispar-GS01_GM000548 | phosphoglycerate kinase | *pgk* | Carbohydrate metabolism | 406 | 701358…702578 |
| M.dispar-GS01_GM000560 | F-type H+-transporting ATPase subunit alpha | *atpA* | Energy metabolism | 508 | 715819…717345 |
| M.dispar-GS01_GM000561 | F-type H+-transporting ATPase subunit beta | *atpD* | Energy metabolism | 458 | 717348…718724 |
| M.dispar-GS01_GM000571 | beta-phosphoglucomutase | *pgmB* | Carbohydrate metabolism | 223 | 746390…747061 |
| M.dispar-GS01_GM000573 | alpha-glucosidase | *malZ* | Carbohydrate metabolism | 544 | 749419…751053 |
| M.dispar-GS01_GM000580 | DNA polymerase III subunit alpha | *dnaE* | Nucleotide metabolism | 989 | 758017…760986 |
| M.dispar-GS01_GM000581 | DNA polymerase I | *polA* | Nucleotide metabolism | 295 | 760979…761866 |
| M.dispar-GS01_GM000599 | glucosamine-6-phosphate deaminase | *nagB* | Carbohydrate metabolism | 254 | 782345…783109 |
| M.dispar-GS01_GM000601 | PTS system, N-acetylglucosamine-specific IIB component | *nagE* | Carbohydrate metabolism | 378 | 783251…784387 |
| M.dispar-GS01_GM000603 | fructose-bisphosphate aldolase, class II | *fbaA* | Carbohydrate metabolism | 276 | 785403…786233 |
| M.dispar-GS01_GM000611 | N-acetylglucosamine-6-phosphate deacetylase | *nagA* | Carbohydrate metabolism | 382 | 792966…794114 |
| M.dispar-GS01_GM000620 | dihydrolipoamide dehydrogenase | *pdhD* | Carbohydrate metabolism | 453 | 804079…805440 |
| M.dispar-GS01_GM000631 | phosphoglycerate mutase | *gpmI* | Carbohydrate metabolism | 505 | 821707…823224 |
| M.dispar-GS01_GM000639 | glycerol-3-phosphate dehydrogenase | *glpA, glpD* | Lipid metabolism | 386 | 831109…832269 |
| M.dispar-GS01_GM000641 | glycerol uptake facilitator protein | *glpF* | Lipid metabolism | 248 | 834542…835288 |
| M.dispar-GS01_GM000642 | glycerol kinase | *glpK* | Lipid metabolism | 520 | 835313…836875 |
| M.dispar-GS01_GM000648 | DNA polymerase III subunit delta | *holA* | Nucleotide metabolism | 309 | 842746…843675 |
| M.dispar-GS01_GM000676 | NADH oxidase | *nox* | Energy metabolism | 460 | 885231…886613 |
| M.dispar-GS01_GM000677 | pyruvate dehydrogenase E1 component subunit beta | *pdhB* | Carbohydrate metabolism | 334 | 887679…888683 |
| M.dispar-GS01_GM000678 | pyruvate dehydrogenase E1 component subunit alpha | *pdhA* | Carbohydrate metabolism | 374 | 888683…889807 |
| M.dispar-GS01_GM000679 | adenine phosphoribosyltransferase | *apt* | Nucleotide metabolism | 171 | 890014…890529 |
| M.dispar-GS01_GM000682 | ATP-dependent 6-phosphofructokinas | *pfkA* | Carbohydrate metabolism | 322 | 893922…894890 |
| M.dispar-GS01_GM000697 | uridylate kinase | *pyrH* | Nucleotide metabolism | 236 | 910978…911688 |
| M.dispar-GS01_GM000699 | phosphatidate cytidylyltransferase | *cdsA* | Lipid metabolism | 308 | 912292…913218 |
| M.dispar-GS01_GM000700 | DNA polymerase III subunit alpha | *polC* | Nucleotide metabolism | 1471 | 913249…917664 |
| M.dispar-GS01_GM000702 | glucose-6-phosphate isomerase | *pgi* | Carbohydrate metabolism | 429 | 918011…919300 |
| M.dispar-GS01_GM000714 | hypoxanthine phosphoribosyltransferase | *hpt* | Nucleotide metabolism | 179 | 933921…934460 |
| M.dispar-GS01_GM000716 | DNA polymerase III subunit delta | *holB* | Nucleotide metabolism | 291 | 935220…936095 |
| M.dispar-GS01_GM000717 | dTMP kinase | *tmk* | Nucleotide metabolism | 217 | 936058…936711 |
| M.dispar-GS01_GM000720 | DNA polymerase III subunit gamma/tau | *dnaX* | Nucleotide metabolism | 713 | 937662…939803 |
| M.dispar-GS01_GM000722 | lipoate-protein ligase A | *lplA* | Metabolism of cofactors and vitamins | 332 | 940302…941300 |
| M.dispar-GS01_GM000723 | triacylglycerol lipase | *lip* | Lipid metabolism | 266 | 941308…942108 |
| M.dispar-GS01_GM000726 | enolase | *eno* | Carbohydrate metabolism | 452 | 944014…945372 |
| M.dispar-GS01_GM000727 | ribulose-phosphate 3-epimerase | *rpe* | Carbohydrate metabolism | 216 | 945583…946233 |
| M.dispar-GS01_GM000729 | guanylate kinase | *gmk* | Nucleotide metabolism | 193 | 947072…947653 |
| M.dispar-GS01_GM000743 | FMN reductase | *ssuE* | Metabolism of cofactors and vitamins | 393 | 964411…965592 |
| M.dispar-GS01_GM000744 | lipoate-protein ligase A | *lplA* | Metabolism of cofactors and vitamins | 343 | 965598…966629 |
| M.dispar-GS01_GM000750 | thioredoxin reductase | *trxB* | Nucleotide metabolism | 306 | 970031…970951 |
| M.dispar-GS01_GM000760 | triosephosphate isomerase | *tpiA* | Carbohydrate metabolism | 242 | 988443…989171 |
| M.dispar-GS01_GM000771 | ribose-phosphate pyrophosphokinase | *prsA* | Carbohydrate metabolism | 330 | 996686…997678 |
| M.dispar-GS01_GM000794 | 1-acyl-sn-glycerol-3-phosphate acyltransferase | *plsC* | Lipid metabolism | 126 | 1021476…1021856 |
| M.dispar-GS01_GM000795 | 1-acyl-sn-glycerol-3-phosphate acyltransferase | *plsC* | Lipid metabolism | 138 | 1021796…1022212 |
